# Supplementary material
Source: publisher site journal article supplement (https://www.dovepress.com/article/368458)
Supplement: Supplementary file 1 [file get_supplementary_file.php]

-Supporting Information-

# DOTAREM (DOTA)–Gold-Nanoparticles: Design, Spectroscopic Evaluation to build Hybrid Contrast Agents to applications in Nanomedecine.

Memona Khan1,Hui Liu2, Pasquale Sacco3-4, Eleonora Marsich3-4, Xiaowu Li2,Nadia Djaker1*and Jolanda Spadavecchia1*

1CNRS, UMR 7244, CSPBAT, Laboratoire de Chimie, Structures et Propriétés de Biomatériaux et d’Agents Thérapeutiques, Université Paris 13, Sorbonne Paris Nord, 1 rue Chablis 93000 Bobigny, France.;

2 Department of Hepatobiliary Surgery, Guangdong Provincial Key Laboratory of Regional Immunity and Diseases& Carson International Cancer Center，Shenzhen University General Hospital & Shenzhen University Clinical Medical Academy Center, Shenzhen University, Shenzhen, China;

3Department of Life Sciences, University of Trieste, Via L. Giorgieri 5, I-34127 Trieste, Italy;

4Department of Medicine, Surgery and Health Sciences, University of Trieste, Piazza dell’Ospitale 1, I-34129 Trieste, Italy;

**Table S1:** T1 post contrast signal enhancement time

| **Product name** | **Maximum Enhancement** | **Clearence** | **Total elimination** |
| --- | --- | --- | --- |
| **DOTA IN-CTL AuNPs** | 0.5h | 1h | 2h |
| **DOTAREM** | 1h | 2h | >2h |

**Figure S1:** Chemical structure of DOTAREM (DOTA). Blue rings and chemical groups are associated to site of complexation with gold ions.

**Scheme S1:** schematic representation of the synthesis of DOTA AuNPs without CTL polymer.

**Figure S2:** UV Vis Absorption spectra of DOTAAuNPs as synthetized ( t: 0 day; black line) and after 48h ( trait line).

**Figure S3:** Stability test DOTA IN-CTL AuNPs in DMEM (5% BSA) in a range time.
